# Supplementary material
Source: publisher figshare collection journal article supplement (https://acs.figshare.com/ndownloader/files/4372774)
Supplement: Supplementary file 1 [file 4372774]

# Supporting Information for

## Hierarchically Ordered Macro-mesoporous TiO<sub>2</sub>-Graphene Composite Films: Improved Mass-transfer, Reduced Charge Recombination and Their Enhanced Photocatalytic Activities

Jiang Du,<sup>†</sup> Xiaoyong Lai,<sup>†</sup> Nailiang Yang,<sup>†</sup> Jin Zhai,<sup>‡</sup> David Kisailus,<sup>#</sup> Fabing Su,<sup>†</sup> Dan Wang,<sup>†,\*</sup> and  
Lei Jiang<sup>‡</sup>

<sup>†</sup>State Key Laboratory of Multi-phase Complex Systems, Institute of Process Engineering, Chinese Academy of Sciences, Beijing 100190, P. R. China. <sup>‡</sup>Beijing University of Aeronautics and Astronautics, Beijing 100191, P. R. China. <sup>#</sup>Department of Chemical and Environmental Engineering, University of California Riverside, CA 92521

Email: [danwang@home.ipe.ac.cn](mailto:danwang@home.ipe.ac.cn)

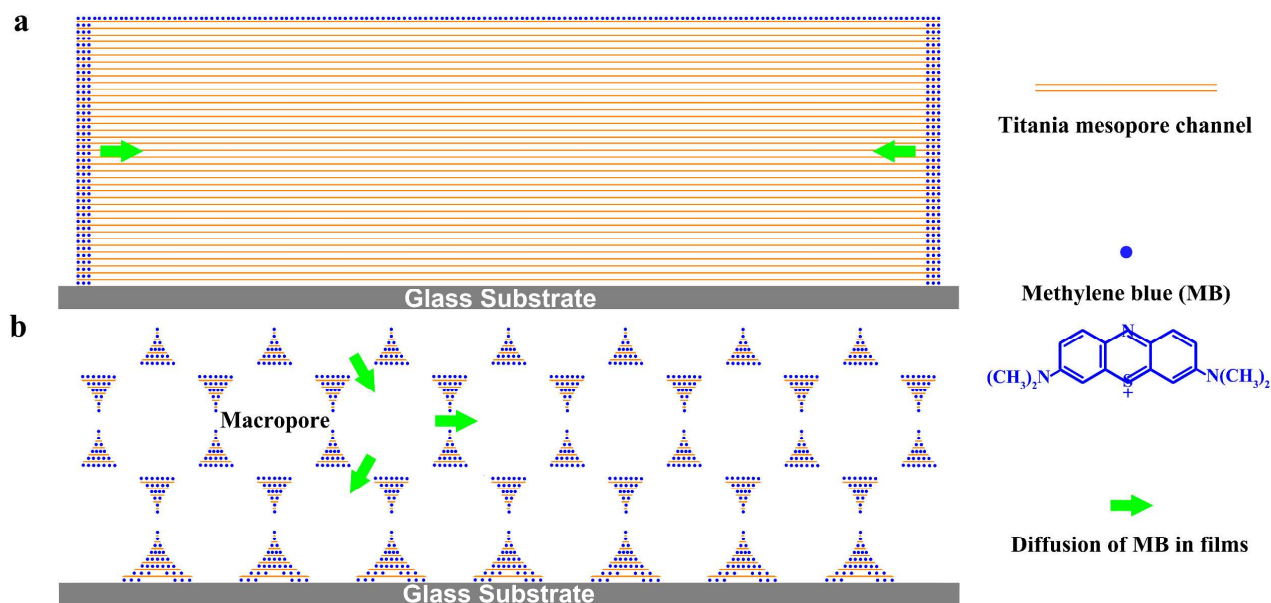

Scheme S1 Difference of photodegradation of methylene blue over (a) pure mesoporous titania film and (b) macro-mesoporous titania film.

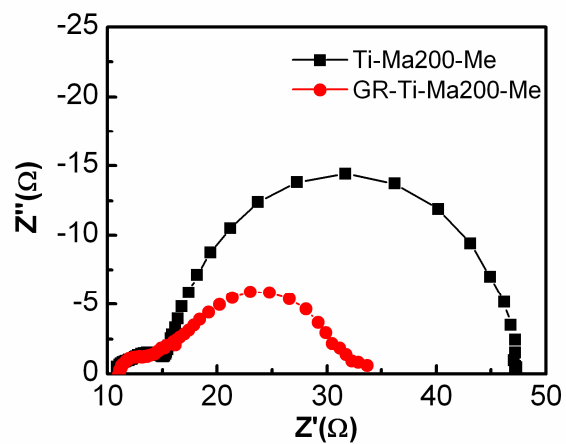

Figure S1. EIS changes of macro-mesoporous titania films without (black line) and with (red line) graphene (Ti-Ma200-Me and GR-Ti-Ma200-Me) under UV radiation.
